# Supplementary material
Source: Springer Nature journal article supplement (https://www.springermedizin.de/resource/supplementary/13054_2013_2953_MOESM1_ESM.pdf/9711824)

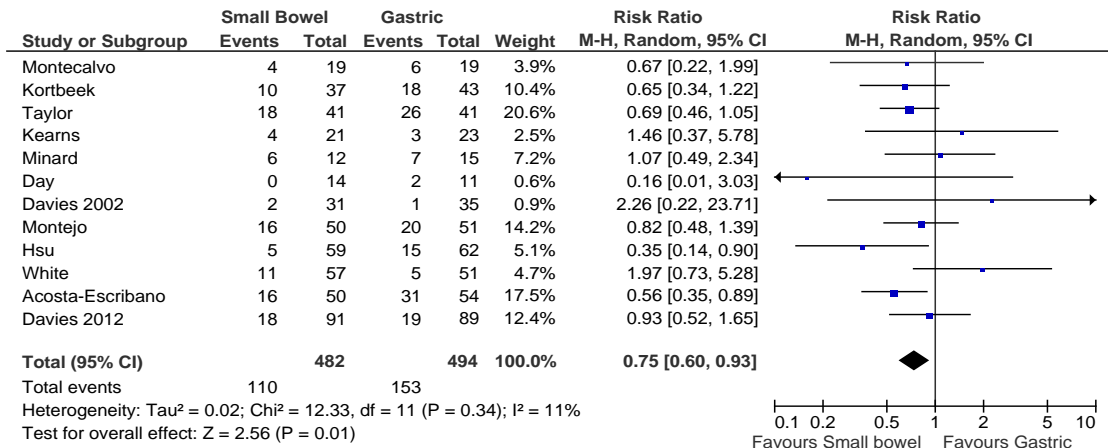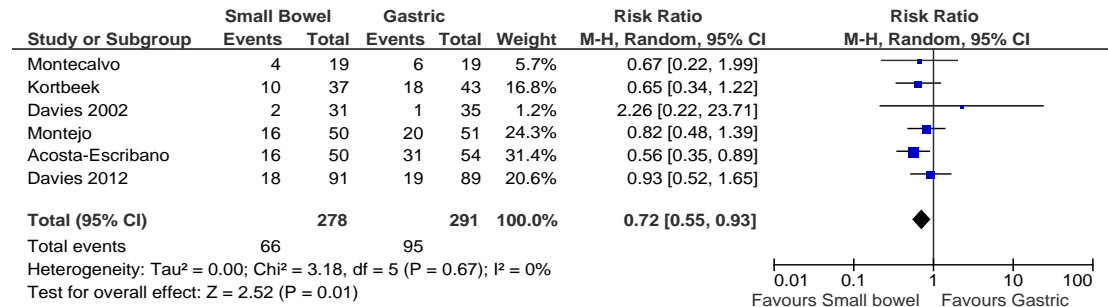

Supplement: MOESM1 [file 9711824]
